# Supplementary material for: Multicolor (Vis-NIR) mesoporous silica nanospheres linked with lanthanide complexes using 2-(5-bromothiophen)imidazo[4,5-f][1,10]phenanthroline for in vitro bioimaging
Source: Royal Society of Chemistry journal article supplement (doi:10.1039/c4dt02444c), 2014-10-20
Supplement: c4dt02444c1.pdf [file c4dt02444c1.pdf]

## Supporting Information

### **Multicolor (Vis-NIR) mesoporous silica nanospheres linking with lanthanide complexes by 2-(5-bromothiophen)imidazo[4,5-f][1,10]phenanthroline for *in vitro* bioimaging**

**Ying Liu,<sup>a</sup> Lining Sun,<sup>\*a</sup> Jinliang Liu,<sup>a</sup> Yu-Xin Peng,<sup>b</sup> Xiaoqian Ge,<sup>a</sup> Liyi Shi,<sup>\*a</sup> and Wei Huang,<sup>\*b</sup>**

<sup>a</sup> Research Center of Nano Science and Technology, Shanghai University, Shanghai 200444, P. R. China. E-mail: [linsun@shu.edu.cn](mailto:linsun@shu.edu.cn); [shiliyi@shu.edu.cn](mailto:shiliyi@shu.edu.cn); Tel: +86-21-66137153

<sup>b</sup> State Key Laboratory of Coordination Chemistry, Nanjing National Laboratory of Microstructures, School of Chemistry and Chemical Engineering, Nanjing University, Nanjing 210093, P. R. China. E-mail: [whuang@nju.edu.cn](mailto:whuang@nju.edu.cn).

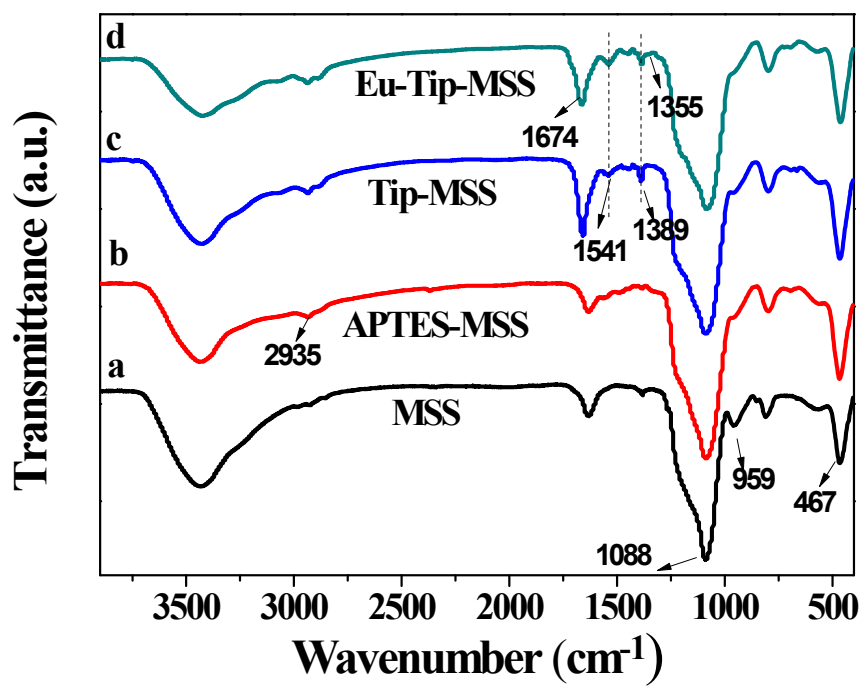

**Fig. S1.** FT-IR spectra of MSS (a), APTES-MSS (b), Tip-MSS (c), Eu-Tip-MSS (d).

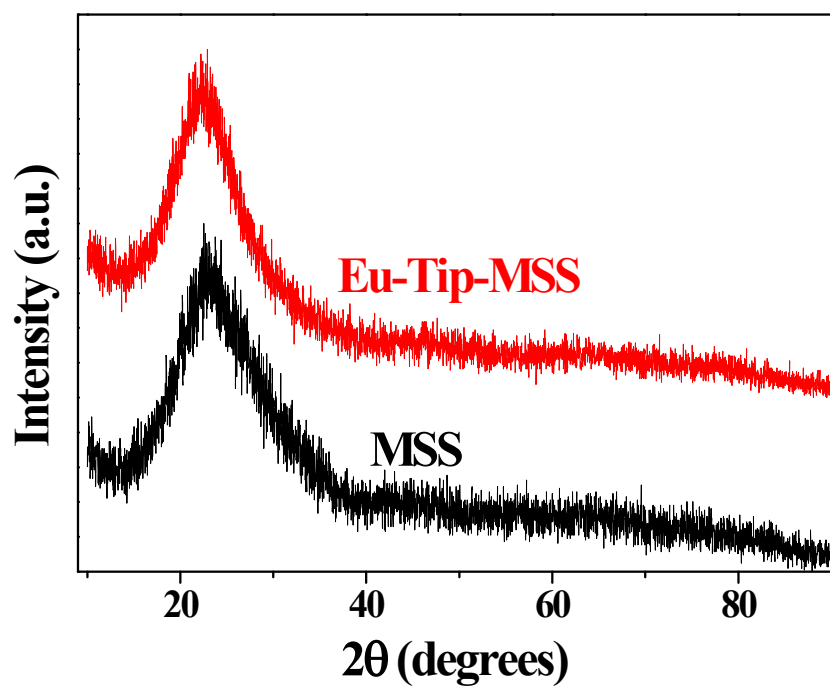

**Fig. S2.** Wide-angle X-ray diffraction patterns of MSS and Eu-Tip-MSS.

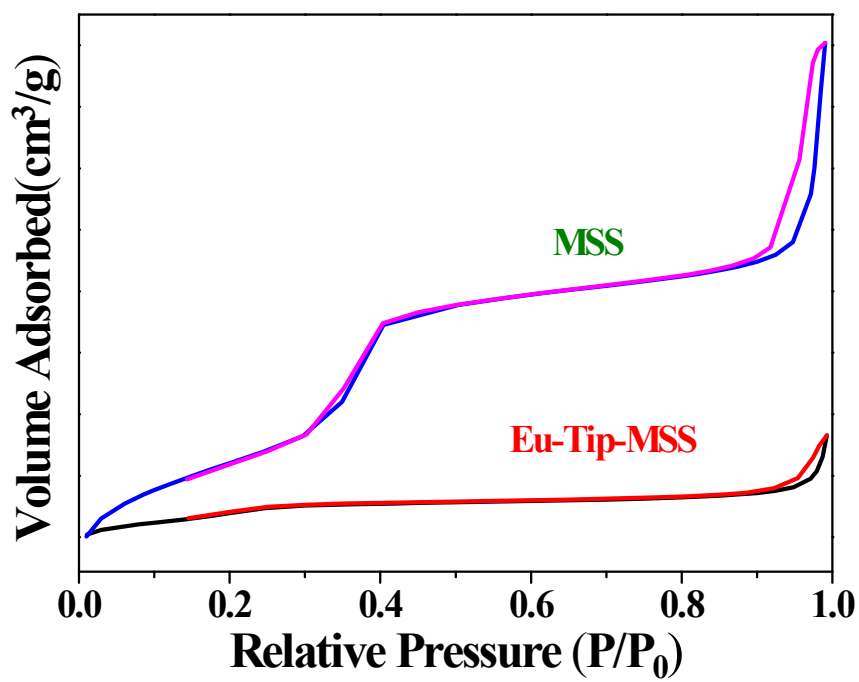

Fig. S3. N<sub>2</sub> adsorption/desorption isotherms of MSS and Eu-Tip-MSS.

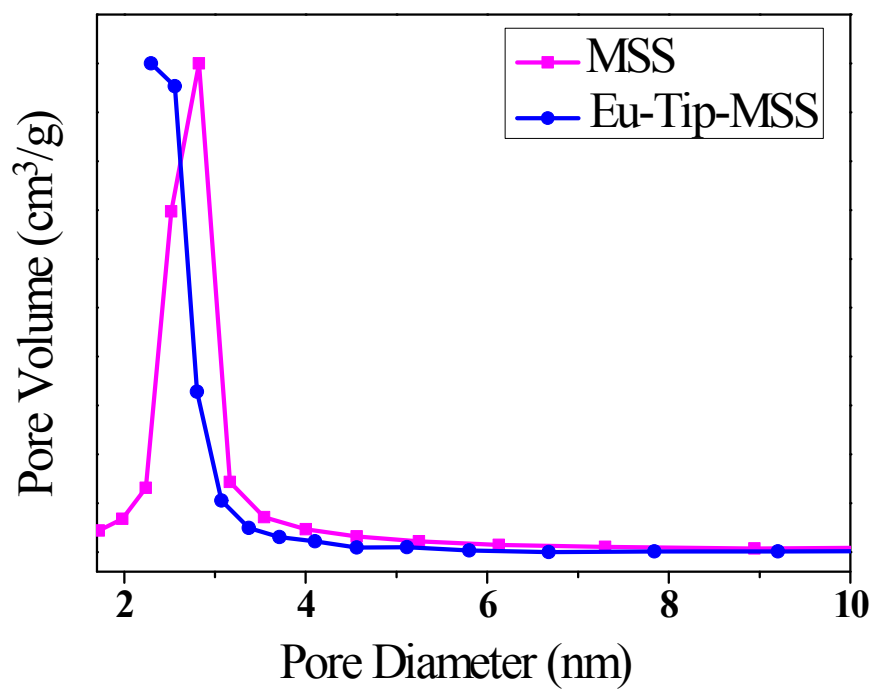

**Fig. S4.** The corresponding BJH pore distributions of MSS and Eu-Tip-MSS.

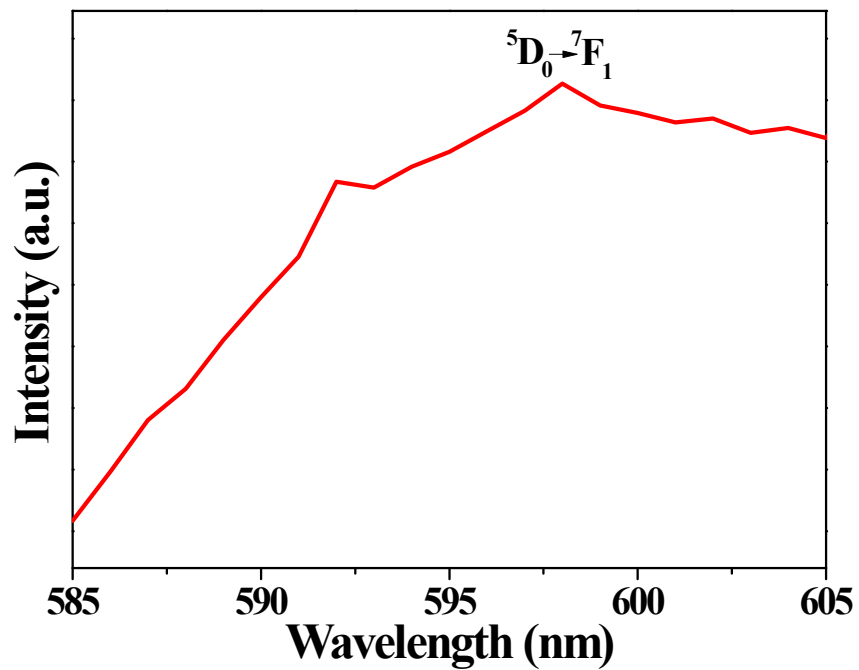

**Fig. S5.** Emission spectrum of Eu-Tip-MSS ( $\lambda_{\text{ex}} = 401\text{ nm}$ ) from 585 nm to 605 nm.

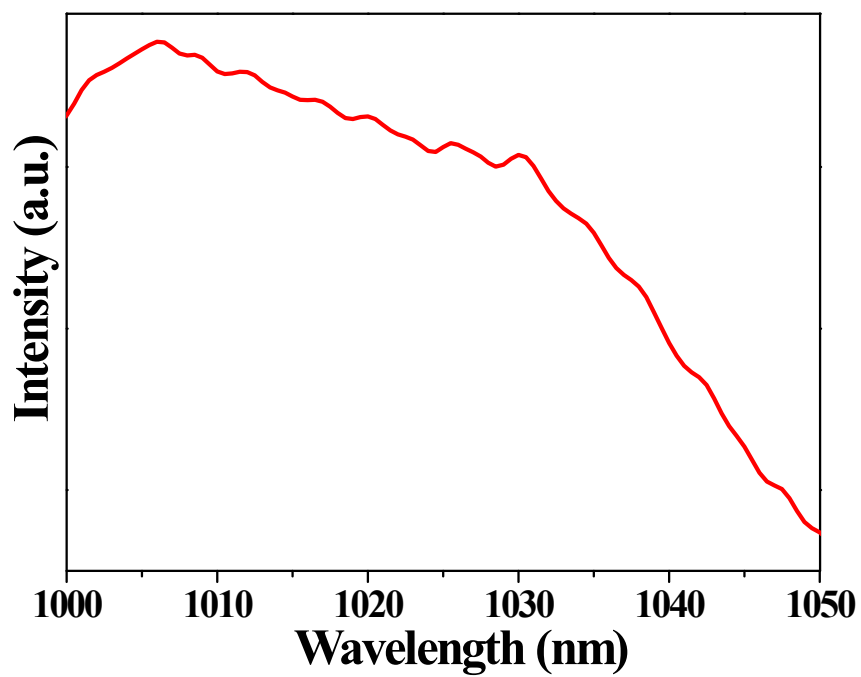

**Fig. S6.** Emission spectrum of Yb-Tip-MSS ( $\lambda_{\text{ex}} = 401\text{nm}$ ) from 1000 nm to 1050 nm.

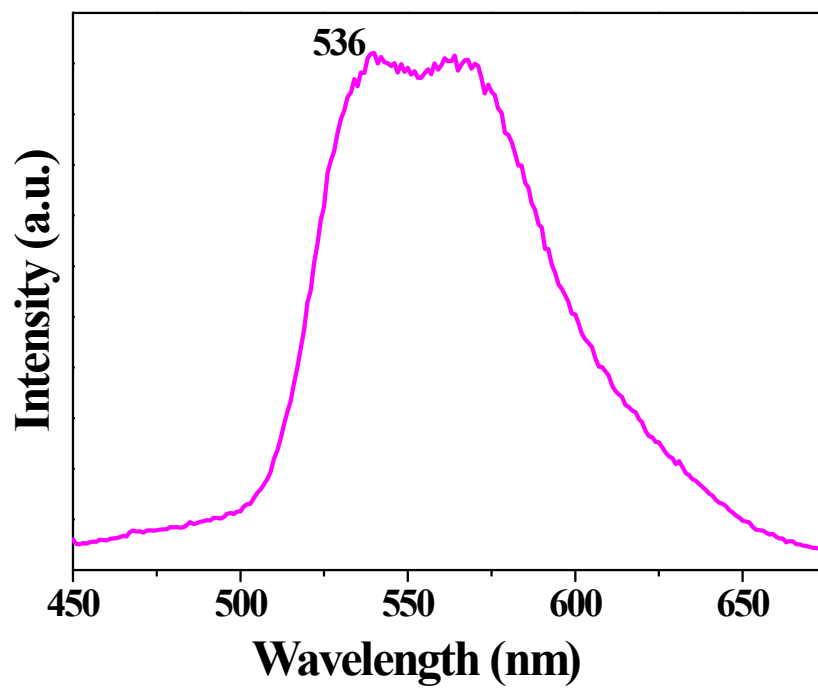

**Fig. S7.** Emission spectrum of Gd(5-Br-Tip)<sub>3</sub> complex ( $\lambda_{\text{ex}} = 380$  nm) at 77 K in solid state.
